# Supplementary material
Source: publisher site journal article supplement (https://www.dovepress.com/article/464335)
Supplement: Supplementary file 1 [file get_supplementary_file.php]

# Supplementary File 1:

**Table S1** Means and standard deviations of items and scales measuring psychosocial determinants of surgical site infection preventive compliance

| Scale<br>Items <sup>a</sup>                                                                                                                            | Physicians |     |     | Nurses |     |     |
|--------------------------------------------------------------------------------------------------------------------------------------------------------|------------|-----|-----|--------|-----|-----|
|                                                                                                                                                        | N          | M   | SD  | N      | M   | SD  |
| <b>Capability</b>                                                                                                                                      | 86         | 5.7 | 1.1 | 186    | 5.6 | 1.0 |
| I have been sufficiently trained to implement these measures in accordance with the guidelines.                                                        | 89         | 4.9 | 1.9 | 190    | 5.5 | 1.6 |
| I am confident in my ability to implement these measures correctly in practice.                                                                        | 89         | 6.0 | 1.1 | 193    | 6.0 | 1.1 |
| Even if I previously made a mistake in relation to these measures, I am confident in my ability to implement them correctly again.                     | 90         | 6.1 | 1.2 | 193    | 6.1 | 1.1 |
| I know exactly how to implement these measures correctly.                                                                                              | 90         | 5.8 | 1.3 | 191    | 5.9 | 1.2 |
| I regularly verify that I have implemented these measures correctly.                                                                                   | 90         | 5.3 | 1.6 | 192    | 5.7 | 1.3 |
| Effectively implementing these measures has become routine for me.                                                                                     | 88         | 5.7 | 1.3 | 190    | 5.8 | 1.2 |
| <b>Opportunity<sup>b</sup></b>                                                                                                                         | 85         | 4.6 | 1.3 | 188    | 4.5 | 1.2 |
| The technical and spatial equipment in “my” ward and operating theatre are appropriate for implementing these measures.                                | 88         | 5.4 | 1.6 | 192    | 5.2 | 1.6 |
| The personnel resources in “my” ward and operating theatre are appropriate for implementing these measures.                                            | 90         | 5.0 | 1.6 | 193    | 4.3 | 1.8 |
| I have sufficient time to implement these measures effectively.                                                                                        | 90         | 4.4 | 1.7 | 193    | 3.9 | 1.7 |
| I have sufficient opportunities to keep me informed about the correct implementation of these measures (in-house standards).                           | 90         | 4.6 | 1.7 | 193    | 4.7 | 1.7 |
| The cooperation between my colleagues and me regarding these measures is effective.                                                                    | 88         | 5.2 | 1.5 | 193    | 5.3 | 1.4 |
| I receive sufficient recognition for implementing these measures, e.g. from my supervisor.                                                             | 89         | 3.6 | 2.1 | 188    | 3.6 | 1.9 |
| <b>Motivation</b>                                                                                                                                      | 89         | 6.2 | 1.1 | 185    | 6.2 | .9  |
| If I implement these measures correctly, I contribute to the prevention of surgical site infections.                                                   | 90         | 6.4 | 1.2 | 191    | 6.3 | 1.0 |
| If I implement these measures correctly, I will be a role model for my colleagues.                                                                     | 89         | 6.0 | 1.5 | 190    | 5.9 | 1.4 |
| I have set myself the goal of always implementing these measures correctly.                                                                            | 90         | 6.2 | 1.2 | 191    | 6.2 | 1.1 |
| As an employee, I feel obliged to always implement these measures correctly.                                                                           | 90         | 6.4 | 1.1 | 192    | 6.4 | .9  |
| <b>Planning</b>                                                                                                                                        | 89         | 3.9 | 1.8 | 184    | 3.9 | 1.7 |
| I have recently developed specific plans for implementing these measures most effectively.                                                             | 89         | 3.8 | 1.9 | 184    | 3.9 | 1.8 |
| I have recently developed specific plans for overcoming barriers and challenges that make the implementation of these measures increasingly difficult. | 89         | 3.9 | 1.8 | 185    | 3.9 | 1.7 |

**Notes:** M, mean; SD, standard deviation.

<sup>a</sup> German originals are available from the senior author upon request.

<sup>b</sup> Comparisons of means of the opportunity scale and items between physicians and nurses may be biased because measurement equivalence was not established

## Supplementary File 2:

**Table S2** Mean rates (in %) and standard deviations of self-reported compliance with surgical site infection (SSI) preventive interventions for which participants reported responsibility for

| SSI-preventive clinical interventions                        | Physicians     |                             |            | Nurses         |                             |            |
|--------------------------------------------------------------|----------------|-----------------------------|------------|----------------|-----------------------------|------------|
|                                                              | N <sup>b</sup> | Mean compliance rate (in %) | SD         | N <sup>b</sup> | Mean compliance rate (in %) | SD         |
| Surgical hand disinfection                                   |                |                             |            |                |                             |            |
| - exposure time                                              | 66             | 96.0                        | 9.2        | 67             | 94.2                        | 11.3       |
| - technique                                                  | 65             | 97.9                        | 5.0        | 67             | 96.4                        | 8.9        |
| Preparing of sterile instruments                             |                |                             |            |                |                             |            |
| - within the operating theatre                               | 30             | 99.0                        | 2.8        | 63             | 98.5                        | 3.7        |
| - outside the operating theatre                              | 29             | 92.4                        | 19.1       | 32             | 96.2                        | 7.8        |
| Covering prepared sterile instruments                        |                |                             |            |                |                             |            |
| - within the operating theatre                               | 30             | 99.3                        | 2.5        | 51             | 89.8                        | 23.8       |
| - outside the operating theatre                              | 24             | 91.1                        | 21.4       | 18             | 89.2                        | 30.7       |
| Hair removal—clipping                                        | 30             | 87.8                        | 21.6       | 50             | 87.8                        | 20.6       |
| Wearing surgical cap                                         | 80             | 99.9                        | 0.7        | 88             | 98.9                        | 3.3        |
| Wearing surgical mask                                        | 81             | 98.1                        | 7.7        | 89             | 95.8                        | 10.5       |
| Use of double gloving                                        | 57             | 84.1                        | 28.5       | 61             | 91.4                        | 18.7       |
| Using remnant antiseptic                                     | 67             | 97.3                        | 7.5        | 64             | 88.8                        | 20.9       |
| Use of iodine-impregnated incision drape                     | 36             | 79.4                        | 33.3       | 33             | 61.0                        | 31.8       |
| Sterile handing over of instruments in the operating theatre | 60             | 97.9                        | 11.0       | 75             | 97.9                        | 7.7        |
| Perioperative antibiotic prophylaxis                         | 82             | 94.3                        | 12.6       | 42             | 88.3                        | 20.2       |
| Perioperative temperature measurement                        | 45             | 82.9                        | 29.1       | 32             | 84.7                        | 18.4       |
| Perioperative blood glucose control                          | 38             | 81.6                        | 25.8       | 21             | 78.6                        | 27.1       |
| Perioperative pre-warming                                    | 43             | 69.0                        | 31.2       | 39             | 68.7                        | 36.6       |
| Examination of the indication of existing surgical drains    | 58             | 92.3                        | 17.3       | 70             | 89.5                        | 16.6       |
| Aseptic dressing change                                      | 59             | 89.4                        | 20.0       | 98             | 92.1                        | 12.6       |
| Septic dressing change                                       | 58             | 88.6                        | 19.7       | 94             | 89.1                        | 16.3       |
| Removing white coat before touching a patient                | 54             | 60.3                        | 37.1       | -              | -                           | -          |
| Hygienic hand disinfection <sup>a</sup>                      |                |                             |            |                |                             |            |
| - before touching a patient                                  | 89             | 81.1                        | 19.6       | 191            | 81.5                        | 16.8       |
| - before aseptic procedures                                  | 87             | 93.5                        | 13.1       | 184            | 92.3                        | 10.6       |
| - after exposure to potentially infectious material          | 90             | 97.9                        | 4.3        | 189            | 95.9                        | 8.6        |
| - after touching a patient                                   | 90             | 87.8                        | 15.6       | 191            | 86.9                        | 15.1       |
| - after touching patients' surroundings                      | 90             | 71.1                        | 24.7       | 190            | 76.1                        | 20.3       |
| <b>Mean overall compliance rate</b>                          | <b>90</b>      | <b>88.8</b>                 | <b>7.5</b> | <b>193</b>     | <b>88.3</b>                 | <b>9.8</b> |

**Note:** SD, standard deviation.

<sup>a</sup> Differences to rates reported in <sup>33</sup> are due to slightly different analytical samples due to missing values.

<sup>b</sup> Denotes the number of respondents who indicated responsibility for the action in question.
